# Supplementary material
Source: Research Square preprint supplement (doi:10.21203/rs.3.rs-10221437/v1)
Supplement: Supplementary file 1 [file 2c201834a4b8bb0c23e8ce94.xlsx]

## Sheet: Table S1
Table S1: Metadata for the 116 Tasmanian devils with known antibody status and MHC-I alleles. The first number in the allele nomenclature refers to the supertype. Shaded rows indicate the 61 included in the GLM analysis
Location	devil ID manuscript	Name	chip	Analysis ID	Sex	YOB	Age at sample collection	MHC antibody	DFT status	UA1	UA2	UB1	UB2	UC1	UC2
FB		Aceh	982000410647193	b5_bc1053_F1	F	2018	4	neg	D-	x	UA*02:01:01:01	UB*10:01:01:01	UB*03:01:01:02	UC*04:01:01:01	UC*01:03:01:01
FB		Admiralty	982000405981308	b5_bc1033_F1	M	2020	2	neg	D+	x	UA*07:01:01:01	UB*09:01:01:01	UB*03:02:01:01	UC*04:01:01:01	UC*01:01:01:01
FB		Amami	956000011333515	b5_bc1048_F1	M	2020	2	neg	D-	UA*02:03:01:01	x	UB*06:01:01:01	UB*09:01:01:01	UC*04:02:01:01	UC*04:01:01:01
FB		Anchor	956000011312423	b5_bc1038_F1	M	2020	2	neg	D-	UA*07:01:01:01	UA*01:03:01:01	UB*03:02:01:01	UB*03:08:01:01	UC*01:01:01:01	UC*01:03:01:01
FB	Au	Attu	982000405976638	b5_bc1068_F1	F	2020	3	pos for MHC+ (2023 sample)	D+ 2022, D- 2023	x	x	UB*09:01:01:01	x	UC*04:01:01:01	UC*01:01:01:01
FB		Badu	956000011328241	b5_bc1043_F1	M	2019	3	neg	D+	x	UA*02:02:01:01	UB*09:01:01:01	UB*12:01:01:01	UC*04:01:01:01	UC*04:02:01:01
FB		Bali	978102100281327	b5_bc1049_F1	F	2020	2	neg	D-	x	UA*02:01:01:01	UB*10:01:01:01	UB*03:01:01:02	UC*04:01:01:01	UC*01:03:01:01
FB		Borneo	956000011302369	b5_bc1061_F1	F	2020	2	neg	D-	x	UA*07:01:01:01	UB*10:01:01:01	UB*03:02:01:01	UC*04:01:01:01	UC*01:01:01:01
FB		Boston	956000011360343	b5_bc1050_F1	F	2019	3	neg	D-	x	x	UB*10:01:01:01	x	UC*04:01:01:01	UC*01:01:01:01
FB		Christmas	982000405980933	b5_bc1035_F1	F	2020	2	neg	D-	x	UA*02:03:01:01	UB*10:01:01:01	UB*06:03:01:01	UC*04:01:01:01	UC*04:05:01:01
FB		Cocos	956000011323734	b5_bc1019_F1	M	2020	2	neg	D+	UA*02:02:01:01	UA*01:03:01:01	UB*08:01:01:01	UB*03:08:01:01	UC*04:02:01:01	UC*01:03:01:01
FB		Dorre	956000011341286	b5_bc1044_F1	M	2020	2	neg	D-	x	UA*02:01:01:01	UB*09:01:01:01	UB*03:01:01:02	UC*04:01:01:01	UC*01:03:01:01
FB		Dunk	982000405980968	b5_bc1080_F1	M	2019	3	neg	D-	x	UA*07:01:01:01	UB*10:01:01:01	UB*03:02:01:01	UC*04:01:01:01	UC*01:01:01:01
FB		Enderby	956000011334683	b5_bc1077_F1	M	2020	2	neg	D-	x	UA*07:01:01:01	UB*09:01:01:01	UB*03:02:01:01	UC*04:01:01:01	UC*01:01:01:01
FB		Falklands	982000405977098	b5_bc1069_F1	F	2020	2	neg	D+	x	UA*02:02:01:01	UB*10:01:01:01	UB*12:01:01:01	UC*04:01:01:01	UC*04:02:01:01
FB		Fb2	982000405976350	b5_bc1065_F1	M	2018	3	MHC+	D-	UA*07:01:01:01	UA*07:01:01:01	UB*03:02:01:01	UB*03:02:01:01	UC*01:01:01:01	UC*01:01:01:01
FB		Fb3	982000405980351	b5_bc1064_F1	M	2018	3	neg	D+	UA*02:02:01:01	x	UB*12:01:01:01	x	UC*04:02:01:01	UC*01:01:01:01
FB		Fb5	982000405980659	b5_bc1040_F1	M	2018	3	neg	D-	x	UA*02:02:01:01	UB*10:01:01:01	UB*12:01:01:01	UC*04:01:01:01	UC*04:02:01:01
FB		Fb6	982000405980934	b5_bc1039_F1	M	2018	3	pos MHC+and MHC-	D-	UA*02:03:01:01	x	UB*06:01:01:01	UB*09:01:01:01	UC*04:02:01:01	UC*04:01:01:01
FB		FB7	982000409633849	b3p1_bc1039	F	2015	6	pos MHC+	D-	x	UA*07:01:01:01	UB*10:01:01:01	UB*03:02:01:01	UC*04:01:01:01	UC*01:01:01:01
FB		Heard	956000011309199	b5_bc1059_F1	F	2020	2	neg	D+	x	UA*07:01:01:01	UB*09:01:01:01	UB*03:02:01:01	UC*04:01:01:01	UC*01:01:01:01
FB		Iceland	956000011327011	b5_bc1032_F1	M	2019	3	neg	D-	UA*02:01:01:01	UA*02:01:01:01	UB*03:01:01:01	UB*03:01:01:02	UC*01:01:01:01	UC*01:03:01:01
FB	Ki	Kaui	982000405977270	b5_bc1020_F1	F	2019	4	pos MHC+	D+ 2022, D- 2023	x	x	UB*09:01:01:01	UB*09:01:01:01	UC*04:01:01:01	UC*04:01:01:01
FB		Keeling	978102100285758	b5_bc1072_F1	F	2019	3	neg	D+	UA*02:01:01:01	UA*02:03:01:01	UB*03:01:01:02	UB*06:01:01:01	UC*01:03:01:01	UC*04:02:01:01
FB		Kodiak	978102100281324	b5_bc1047_F1	M	2019	3	neg	D+	x	UA*02:02:01:01	UB*10:01:01:01	UB*12:01:01:01	UC*04:01:01:01	UC*04:02:01:01
FB		Maldive	956000011359837	b5_bc1060_F1	M	2020	2	neg	D+	x	UA*02:02:01:01	UB*10:01:01:01	UB*12:01:01:01	UC*04:01:01:01	UC*04:02:01:01
FB		Malvinas	982000405980856	b5_bc1055_F1	M	2020	2	neg	D+	x	x	UB*10:02:01:01	UB*10:02:01:01	UC*04:01:01:01	UC*04:01:01:01
FB		Mauritius	982000405976996	b5_bc1046_F1	F	2020	2	neg	D+	x	x	UB*10:01:01:01	UB*10:01:01:01	UC*04:01:01:01	UC*04:01:01:01
FB		Moreton	978102100282230	b5_bc1073_F1	F	2020	2	neg	D+	x	UA*02:03:01:01	UB*10:01:01:01	UB*06:01:01:01	UC*04:01:01:01	UC*04:02:01:01
FB		Nauru	982000405976819	b5_bc1067_F1	M	2020	2	neg	D-	x	x	UB*10:01:01:01	UB*10:01:01:01	UC*04:01:01:01	UC*04:01:01:01
FB		Okinawa	982000405977179	b5_bc1054_F1	M	2020	2	pos MHC+	D+	x	x	UB*10:01:01:01	UB*10:01:01:01	UC*04:01:01:01	UC*04:01:01:01
FB		Sado	956000011336231	b5_bc1041_F1	F	2020	2	neg	D-	x	UA*07:01:01:01	UB*09:01:01:01	UB*03:02:01:01	UC*04:01:01:01	UC*01:01:01:01
FB		Seychelles	956000011308806	b5_bc1063_F1	F	2020	2	neg	D+	UA*02:01:01:01	x	UB*03:01:01:01	UB*09:01:01:01	UC*01:01:01:01	UC*04:01:01:01
FB		Stewart	982000405976535	b5_bc1078_F1	M	2020	2	neg	D+	UA*07:01:01:01	UA*01:03:01:01	UB*03:02:01:01	UB*03:08:01:01	UC*01:01:01:01	UC*01:03:01:01
FB	Tn	Taiwan	982000405980434	b5_bc1031_F1	F	2020	2	pos MHC+	D+	x	x	UB*10:01:01:01	UB*10:01:01:01	UC*04:01:01:01	UC*04:01:01:01
FB		Vanuatu	982000405980625	b5_bc1045_F1	M	2020	2	neg	D+	x	UA*02:02:01:01	UB*09:01:01:01	UB*12:01:01:01	UC*04:01:01:01	UC*04:02:01:01
FB		Wedge	956000011367345	b5_bc1036_F1	M	2020	2	neg	D-	UA*02:03:02:01	UA*02:03:01:01	UB*06:02:01:01	UB*06:03:01:01	UC*04:03:01:01	UC*04:05:01:01
GH		BigBiy	956000011359456	b5_bc1082_F1	F	2019	3	neg	D-	x	UA*01:01:01:01	UB*10:01:01:01	UB*06:03:01:01	UC*04:01:01:01	UC*04:03:01:01
GH		Georgia	978102100286512	b5_bc1081_F1	M	2019	3	neg	D-	UA*02:02:01:01	UA*01:01:01:01	UB*12:01:01:01	UB*06:03:01:01	UC*04:02:01:01	UC*04:03:01:01
GH		Jaws	956000011308135	b5_bc1083_F1	M	2019	3	neg	D-	x	x	UB*10:01:01:01	UB*10:01:01:01	UC*04:01:01:01	UC*04:01:01:01
GH		Mathew	978102100290752	b5_bc1084_F1	M	2019	3	neg	D-	x	UA*02:01:01:01	UB*09:01:01:01	UB*03:04:01:01	UC*04:01:01:01	UC*01:01:01:01
Kempton		Bandel	982000409262547	b5_bc1092_F1	M	2020	2	neg	D-	UA*07:01:01:01	UA*05:01:01:01	UB*03:02:01:01	UB*11:01:01:01	UC*01:01:01:01	UC*01:01:01:01
Kempton		Brie	982000362012478	b5_bc1093_F1	F	2020	2	neg	D-	x	x	UB*10:01:01:01	UB*10:02:01:01	UC*04:01:01:01	UC*04:01:01:01
Kempton		Butterfly	956000013217880	b5_bc1094_F1	F	2020	2	neg	D-	UA*07:01:01:01	UA*07:01:01:01	UB*03:02:01:01	UB*03:02:01:01	UC*01:01:01:01	UC*01:01:01:01
Kempton		Chechil	982000409262643	b5_bc1095_F1	M	2020	2	neg	D+	x	UA*02:03:01:01	UB*03:02:01:01	UB*06:01:01:01	UC*01:01:01:01	UC*04:02:01:01
Kempton		Cricket	956000011335812	b5_bc1087_F1	M	2019	3	pos MHC+	D+	x	x	UB*10:01:01:01	x	UC*04:01:01:01	UC*01:01:01:01
Kempton		Gorgonzolla	982000405974848	b5_bc1088_F1	F	2019	3	pos MHC+	D+	UA*07:01:01:01	UA*07:01:01:01	UB*03:02:01:01	UB*03:02:01:01	UC*01:01:01:01	UC*01:01:01:01
Kempton		Haloumi	982000409577890	b5_bc1096_F1	F	2020	2	neg	D-	UA*07:01:01:01	UA*07:01:01:01	UB*03:02:01:01	UB*03:02:01:01	UC*01:01:01:01	UC*01:01:01:01
Kempton		Mantis	956000011335615	b5_bc1033_F2	F	2020	2	neg	D-	UA*07:01:01:01	UA*02:02:01:01	UB*03:02:01:01	UB*12:01:01:01	UC*01:01:01:01	UC*04:02:01:01
Kempton		Mascarpone	982000361969132	b5_bc1089_F1	F	2019	3	pos MHC+	D+	x	UA*07:01:01:01	UB*09:01:01:01	UB*03:02:01:01	UC*04:01:01:01	UC*01:01:01:01
Kempton		Roquefort	982000361996091	b5_bc1085_F1	M	2018	4	pos MHC+	D-	UA*07:01:01:01	UA*07:01:01:01	UB*03:02:01:01	UB*03:02:01:01	UC*01:01:01:01	UC*01:01:01:01
Kempton		Rubicon	982000405960029	b5_bc1090_F1	M	2019	3	pos MHC+	D+	x	x	UB*09:01:01:01	UB*10:02:01:01	UC*04:01:01:01	UC*04:01:01:01
Kempton		Stag	956000013215428	b5_bc1091_F1	M	2019	3	neg	D-	x	UA*07:01:01:01	UB*10:01:01:01	UB*03:02:01:01	UC*04:01:01:01	UC*01:01:01:01
Kempton		Stilton	982000405981328	b5_bc1086_F1	M	2018	4	neg	D-	x	x	UB*09:01:01:01	UB*10:02:01:01	UC*04:01:01:01	UC*04:01:01:01
Kempton		Talleggio	982000405975282	b5_bc1034_F2	F	2020	2	neg	D-	UA*07:01:01:01	UA*07:01:01:01	UB*03:02:01:01	UB*03:02:01:01	UC*01:01:01:01	UC*01:01:01:01
NNP		Avoca	982000405976390	b5_bc1037_F2	F	2019	2	neg	D-	x	x	UB*10:02:01:01	UB*09:01:01:01	UC*04:01:01:01	UC*04:01:01:01
NNP		Chester	982000405962069	b5_bc1044_F2	M	2019	2	neg	D+	x	UA*02:02:01:01	UB*10:01:01:01	UB*08:01:01:01	UC*04:01:01:01	UC*04:02:01:01
NNP	Ga	Ginevra	982000356526675	b2p2_bc1027	F	2012	7	MHC+	D-	x	x	UB*10:02:01:01	UB*10:01:01:01	UC*04:01:01:01	UC*04:01:01:01
NNP		Jamaica	982000405981173	b5_bc1042_F2	M	2019	2	pos MHC+	D-	x	x	UB*10:01:01:01	UB*10:01:01:01	UC*04:01:01:01	UC*04:01:01:01
NNP		Kenya	982000405977141	b5_bc1040_F2	F	2019	2	neg	D+	UA*02:02:01:01	UA*07:01:01:01	UB*08:01:01:01	UB*03:02:01:01	UC*04:02:01:01	UC*01:01:01:01
NNP		Oman	982000405923158	b5_bc1043_F2	M	2019	2	neg	D-	x	UA*01:01:01:01	UB*10:01:01:01	UB*06:03:01:01	UC*04:01:01:01	UC*04:03:01:01
NNP		Preston	982000405976627	b5_bc1036_F2	M	2018	3	neg	D+	x	x	UB*10:01:01:01	UB*10:01:01:01	UC*04:01:01:01	UC*04:01:01:01
NNP		Ranelagh	982000405962103	b5_bc1038_F2	F	2019	2	neg	D-	UA*02:02:01:01	UA*02:01:01:01	UB*08:01:01:01	UB*03:06:01:01	UC*04:02:01:01	UC*01:01:01:01
NNP	Sy	Selby	982000405977234	b5_bc1041_F2	F	2019	5	pos MHC+	D-	UA*07:01:01:01	x	UB*03:02:01:01	x	UC*01:01:01:01	UC*01:01:01:01
SH		Akiva	982000363413078	b4_bc1056_F1	M	2015	2	neg	D+	UA*02:03:01:01	UA*02:03:02:01	UB*06:01:01:01	UB*06:02:01:01	UC*04:02:01:01	UC*04:03:01:01
SH		Amethyst	982000405977428	b3p2_bc1018	F	2016	2	neg	D-	UA*02:04:01:01	x	UB*03:05:01:01	x	UC*01:02:01:01	UC*01:01:01:01
SH		Black Sapote	982000405975689	b4_bc1033_F2	F	2017	3	pos MHC+	D-	x	x	UB*10:02:01:01	UB*04:01:01:01	UC*04:01:01:01	UC*04:01:01:01
SH		Brimstone	982000405800521	b2p1_bc1022	M	2015	3	MHC+ and MHC-	D+	x	x	UB*10:01:01:01	UB*09:01:01:01	UC*04:01:01:01	UC*04:01:01:01
SH		Clay	982000405978328	b3p2_bc1027	M	2016	2	neg	D+	x	UA*02:02:01:01	UB*10:01:01:01	UB*12:01:01:01	UC*04:01:01:01	UC*04:02:01:01
SH		Durian		b3p2_bc1036	F	2016	2	neg	D-	UA*02:03:01:01	UA*02:03:02:01	UB*06:01:01:01	UB*06:02:01:01	UC*04:02:01:01	UC*04:03:01:01
SH		Emerald	982000405977509	b3p2_bc1021	F	2016	2	neg	D+	UA*02:01:01:01	UA*02:03:01:01	UB*03:01:01:01	UB*06:01:01:01	UC*01:01:01:01	UC*04:02:01:01
SH		Enki	982000405961993	b4_bc1062_F2	M	2018	2	neg	D-	x	UA*02:01:01:01	UB*09:01:01:01	UB*03:01:01:03	UC*04:01:01:01	UC*01:01:01:01
SH		Flint	982000409568843	b4_bc1077_F2	M	2017	3	neg	D+	x	x	UB*09:01:01:01	UB*10:02:01:01	UC*04:01:01:01	UC*04:01:01:01
SH		Fuschia	982000405983459	b2p2_bc1058	F	2018	2	neg	D+	x	UA*02:02:01:01	UB*10:01:01:01	UB*12:01:01:01	UC*04:01:01:01	UC*04:02:01:01
SH		Ganesh	982000405984339	b4_bc1019_F2	M	2017	3	neg	D+	UA*02:03:01:01	UA*02:02:01:01	UB*06:01:01:01	UB*12:01:01:01	UC*04:02:01:01	UC*04:02:01:01
SH		Garnet	982000405978013	b3p2_bc1022	F	2016	3	neg	D+	UA*02:01:01:01	UA*02:01:01:01	UB*03:01:01:01	UB*03:05:01:01	UC*01:01:01:01	UC*01:02:01:01
SH		Grape	982009405975392	b5_bc1053_F2	F	2017	2	neg	D-	x	UA*02:01:01:01	UB*10:01:01:01	UB*08:03:01:01	UC*04:01:01:01	UC*01:01:01:01
SH		Hashem	982000409261902	b4_bc1086_F2	M	2018	2	pos MHC+,	D+	x	x	UB*10:01:01:01	x	UC*04:01:01:01	UC*01:01:01:01
SH		Heather	982000405976609	b5_bc1054_F2	F	2017	3	pos MHC+	D-	x	x	UB*04:01:01:01	x	UC*04:01:01:01	UC*01:01:01:01
SH		Husky	982000405949781	b3p2_bc1015	M	2015	2	neg	D-	UA*02:01:01:01	UA*02:04:01:01	UB*03:03:01:01	UB*03:05:01:01	UC*01:01:01:01	UC*01:02:01:01
SH		Isis	982000409568832	b4_bc1015_F2	F	2018	2	neg	D+	x	x	UB*10:02:01:01	x	UC*04:01:01:01	UC*01:01:01:01
SH		Jizo	982000405983930	b4_bc1096_F2	M	2018	2	neg	D-	UA*02:03:01:01	UA*02:02:01:01	UB*06:01:01:01	UB*12:01:01:01	UC*04:02:01:01	UC*04:02:01:01
SH		Lapis	982000363454835	b3p2_bc1024	F	2016	2	neg	D+	UA*02:01:01:01	UA*02:01:01:01	UB*03:01:01:01	UB*03:01:01:01	UC*01:01:01:01	UC*01:01:01:01
SH		Lavender	982000405979176	b2p2_bc1065	F	2018	2	neg	D-	x	x	UB*10:01:01:01	UB*10:02:01:01	UC*04:01:01:01	UC*04:01:01:01
SH		Lemon	982000405979275	b4_bc1067_F2	F	2017	3	neg	D+	x	UA*02:02:01:01	UB*10:01:01:01	UB*12:01:01:01	UC*04:01:01:01	UC*04:02:01:01
SH		Lychee	982000405978699	b4_bc1075_F2	F	2017	2	neg	D+	UA*02:01:01:01	x	UB*03:01:01:01	UB*09:01:01:01	UC*01:01:01:01	UC*04:01:01:01
SH		Madrigal	982000363283193	b4_bc1026_F1	F	2015	2	neg	D-	UA*02:03:01:01	UA*02:04:01:01	UB*06:01:01:01	UB*03:05:01:01	UC*04:02:01:01	UC*01:02:01:01
SH		Mandarin	982000405983657	b4_bc1083_F2	F	2017	2	neg	D-	x	UA*02:01:01:01	UB*10:01:01:01	UB*08:03:01:01	UC*04:01:01:01	UC*01:01:01:01
SH		Mercury	982000405977541	b5_bc1024_F2	M	2016	2	pos MHC+> MHC-	D+	x	x	UB*10:01:01:01	UB*10:01:01:01	UC*04:01:01:01	UC*04:01:01:01
SH		Muskmelon	982009105005289	b4_bc1012_F2	F	2017	2	neg	D-	UA*02:03:01:01	x	UB*06:01:01:01	x	UC*04:02:01:01	UC*01:01:01:01
SH	On	Obsidian	982000405977892	b4_bc1001_F2	M	2016	2	pos MHC+>MHC-	D+	UA*02:01:01:01	UA*02:04:01:01	UB*03:07:01:01	UB*03:05:01:01	UC*01:01:01:01	UC*01:02:01:01
SH		Odin	982000405984226	b5_bc1055_F2	M	2017	2	neg	D-	UA*02:03:01:01	x	UB*06:01:01:01	x	UC*04:02:01:01	UC*01:01:01:01
SH		Osiris	982009104922209	b4_bc1009_F2	M	2016	3	neg	D-	x	UA*02:02:01:01	UB*10:01:01:01	UB*12:01:01:01	UC*04:01:01:01	UC*04:02:01:01
SH		Pawpaw	982000405796562	b3p2_bc1037	F	2016	2	neg	D-	UA*02:01:01:01	UA*02:02:01:01	UB*03:07:01:01	UB*12:01:01:01	UC*01:01:01:01	UC*04:02:01:01
SH		Peach	982000405983641	b3p2_bc1038	F	2016	2	neg	D-	x	UA*02:01:01:01	UB*10:01:01:01	UB*03:05:01:01	UC*04:01:01:01	UC*01:02:01:01
SH		Pearl	982000405795815	b3p2_bc1034	F	2016	2	neg	D-	UA*02:01:01:01	x	UB*03:03:01:01	x	UC*01:01:01:02	UC*01:01:01:01
SH		Pitch	982000405977243	b5_bc1052_F2	M	2016	4	neg	D+	x	x	UB*10:01:01:01	UB*10:01:01:01	UC*04:01:01:01	UC*04:01:01:01
SH		Pomegranate	982000405793997	b4_bc1052_F2	F	2017	2	neg	D-	x	UA*02:02:01:01	UB*10:01:01:01	UB*12:01:01:01	UC*04:01:01:01	UC*04:02:01:01
SH		Princess Philthy	982000363392533	b4_bc1037_F1	F	2015	3	neg	D+	x	UA*02:04:01:01	UB*10:01:01:01	UB*03:05:01:01	UC*04:01:01:01	UC*01:02:01:01
SH		Proserpine	982000409568707	b4_bc1008_F2	F	2018	2	neg	D-	x	x	UB*10:01:01:01	UB*09:01:01:01	UC*04:01:01:01	UC*04:01:01:01
SH		Pumpkin	982000405978897	b4_bc1005_F1	M	2015	3	neg	D+	UA*02:03:01:01	UA*02:01:01:01	UB*06:01:01:01	UB*03:01:01:03	UC*04:02:01:01	UC*01:01:01:01
SH		Raspberry	982009104793710	b4_bc1068_F2	F	2017	2	neg	D-	x	UA*02:01:01:01	UB*09:01:01:01	UB*03:05:01:01	UC*04:01:01:01	UC*01:02:01:01
SH		Ruby	982000405800801	b4_bc1052_F1	F	2016	2	neg	D+	x	UA*02:01:01:01	UB*10:01:01:01	UB*03:05:01:01	UC*04:01:01:01	UC*01:02:01:01
SH		Shadow	982000409569288	b4_bc1032_F2	M	2018	2	neg	D+	UA*02:03:01:01	UA*02:01:01:01	UB*06:01:01:01	UB*03:07:01:01	UC*04:02:01:01	UC*01:01:01:01
SH		Silverbeet	982009104851955	b4_bc1092_F2	M	2017	2	neg	D-	UA*02:03:01:01	UA*02:01:01:01	UB*06:01:01:01	UB*03:07:01:01	UC*04:02:01:01	UC*01:01:01:01
SH		Slate	982000405797167	b3p2_bc1035	M	2016	2	neg	D-	x	x	UB*10:01:01:01	UB*10:01:01:01	UC*04:01:01:01	UC*04:01:01:01
SH		Squash	982000405976154	b4_bc1006_F1	M	2016	3	neg	D-	UA*02:01:01:03	x	UB*03:03:01:01	x	UC*01:01:01:01	UC*01:01:01:01
SH		SukunaBiko	982009105006825	b5_bc1057_F2	M	2017	3	neg	D-	x	UA*02:02:01:01	x	UB*08:02:01:01	UC*01:01:01:01	UC*04:02:01:01
SH		Surya	982009104997798	b4_bc1048_F2	M	2017	2	neg	D-	UA*02:03:01:01	UA*02:03:02:01	UB*06:01:01:01	UB*06:02:01:01	UC*04:02:01:01	UC*04:03:01:01
SH		Syn	982000405961813	b4_bc1056_F2	F	2018	2	neg	D-	x	UA*02:02:01:01	UB*09:01:01:01	UB*12:01:01:01	UC*04:01:01:01	UC*04:02:01:01
SH	Ty	Tilly	982000405949360	b4_bc1019_F1	F	2013	6	pos MHC+	D-	x	x	UB*10:01:01:01	x	UC*04:01:01:01	UC*01:01:01:01
SH		Umber	982000409567038	b4_bc1053_F2	M	2017	3	neg	D+	x	UA*02:01:01:01	UB*10:01:01:01	UB*03:04:01:01	UC*04:01:01:01	UC*01:01:01:01
SH		Yam	982009104985805	b4_bc1007_F1	M	2016	2	neg	D-	UA*02:03:01:01	UA*02:04:01:01	UB*06:01:01:01	UB*03:05:01:01	UC*04:02:01:01	UC*01:02:01:01
SH		Zuzana	982000363410824	b4_bc1030_F1	F	2015	3	Sep 2017 neg; Feb 2018 pos MHC+	D+	x	x	UB*10:01:01:01	x	UC*04:01:01:01	UC*01:01:01:01
Wuk		Daisy	982000362816290	b3p2_bc1044	F	2015	2	pos MHC+	D+	UA*01:02:02:01	x	UB*06:02:01:01	x	UC*04:03:01:01	UC*01:01:01:01
Wuk		WBSE	982000363393199	b2p2_bc1035	M	2014	3	MHC+	D-	x	UA*01:02:02:01	x	UB*06:02:01:01	UC*01:01:01:01	UC*04:03:01:01
C5065		DFT1_cell_line		DFT1						UA*02:01:01:01	UA*02:03:01:01	UB*03:03:01:01	UB*06:01:01:01	UC*01:01:01:01	UC*04:02:01:01
C1426		DFT1_cell_line_strain2		DFT1_strain2						UA*02:01:01:01	UA*02:03:01:01	UB*03:03:01:01	UB*06:01:01:01	UC*01:01:01:01	UC*04:02:01:01
